# Supplementary material for: Decoding lithium-ion dynamics: unveiling the role of concentrations and local environments in spinel Li x Mn 2 O 4
Source: Royal Society of Chemistry journal article supplement (doi:10.1039/d5cp00523j), 2025-01-01
Supplement: d5cp00523j1.pdf [file d5cp00523j1.pdf]

## **Decoding Lithium-Ion Dynamics: Unveiling the Role of Concentration and Local Environments in Spinel $\text{Li}_x\text{Mn}_2\text{O}_4$**

Yingxin Duan <sup>a</sup>, Xiao Liu <sup>a</sup>, Xuhong Wu <sup>a</sup>, Zhi Yang<sup>a</sup>, Ruiping Liu <sup>a</sup>, Lin Xue <sup>a</sup>,  
Fenglian Li <sup>b</sup>, Jian-Li Shao <sup>c</sup> and Li-Chun Xu <sup>\*,a</sup>

<sup>a</sup> College of Physics and Optoelectronics, Taiyuan University of Technology, Jinzhong 030600,  
China

<sup>b</sup> College of Electronic Information Engineering, Taiyuan University of Technology, Jinzhong  
030600, China

<sup>c</sup> State Key Laboratory of Explosion Science and Technology, Beijing Institute of Technology,  
Beijing 100081, China

\*Corresponding author.

E-mail addresses: [xulichun@tyut.edu.cn](mailto:xulichun@tyut.edu.cn)

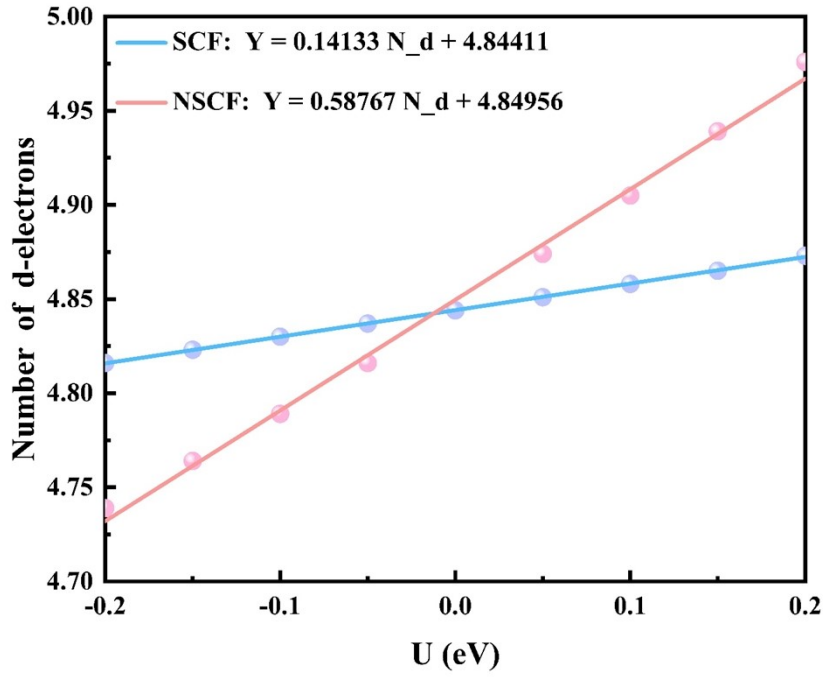

**Fig. S1** Linear fit of the number of Mn  $d$ -electrons and the additional potential  $U$ .

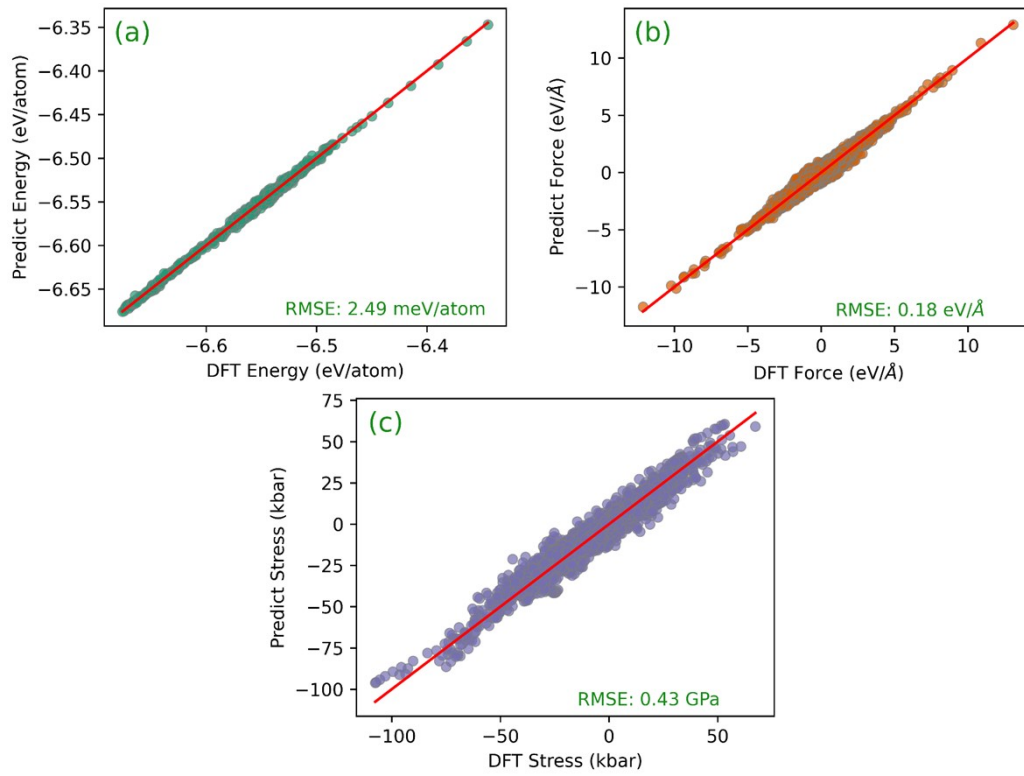

**Fig. S2** The differences between the energies, forces, and stress tensors predicted by the MLFF and the DFT calculations.

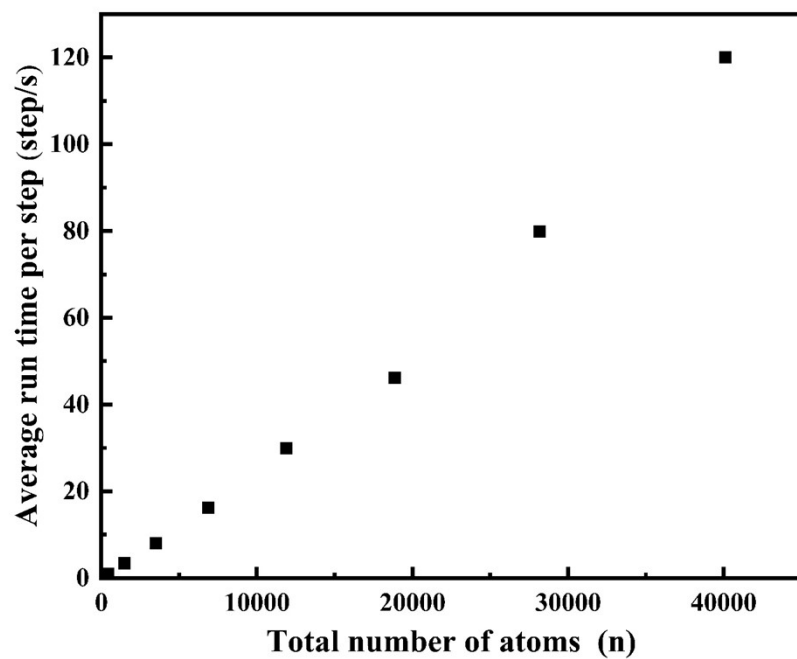

**Fig. S3** Relationship between average run time per step and number of atoms.

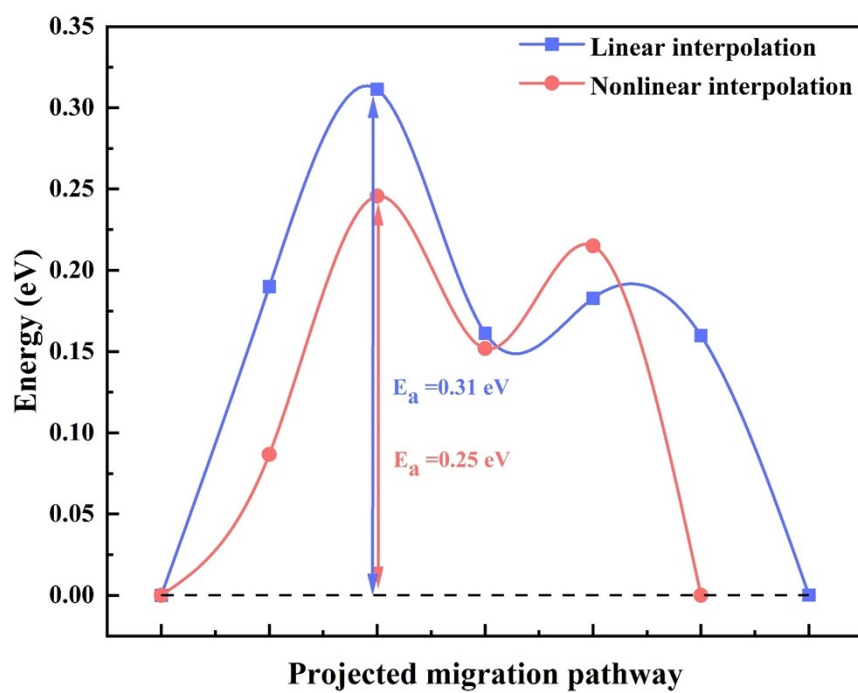

**Fig. S4** Computational differences between linear and nonlinear interpolation.

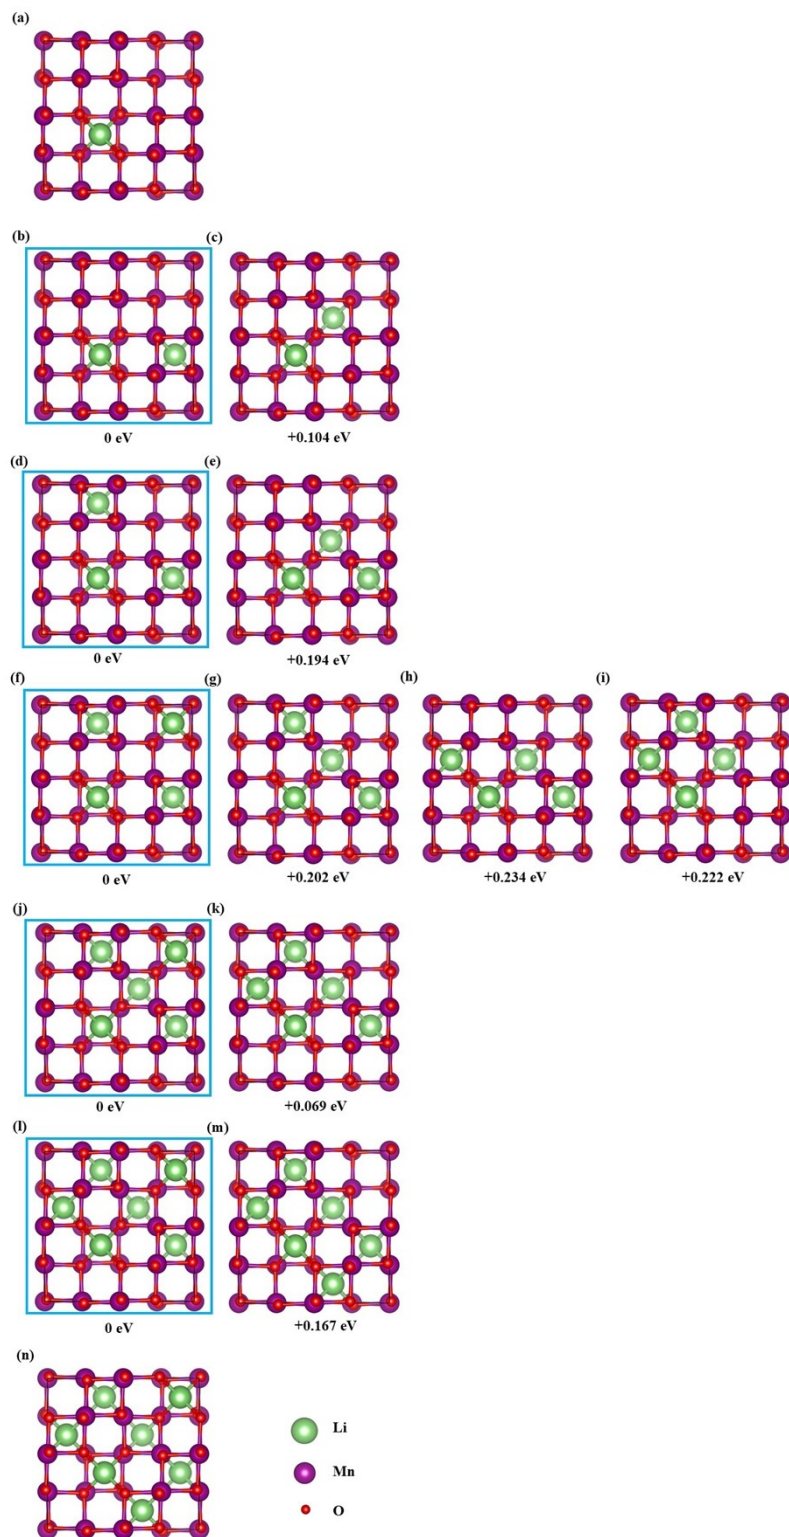

**Fig. S5** Disorder Code Generated Configurations. All possible configurations at varying concentrations ( $x$ ): (a)  $x = 0.125$ , (b)-(c)  $x = 0.250$ , (d)-(e)  $x = 0.375$ , (f)-(i)  $x = 0.500$ , (j)-(k)  $x = 0.625$ , (l)-(m)  $x = 0.750$ , and (n)  $x = 0.875$ . Blue boxes highlight the minimum-energy and most stable configurations for each concentration.

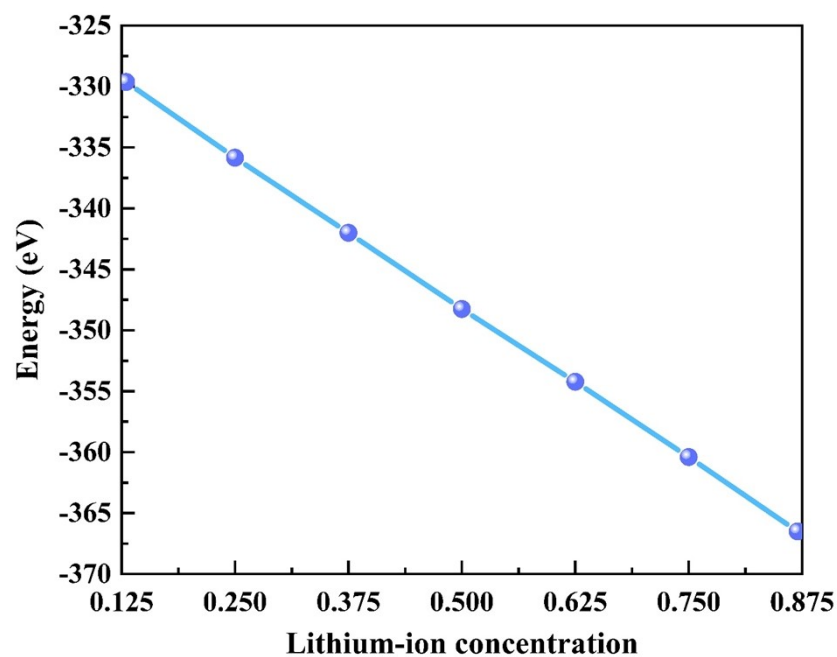

**Fig. S6** The variation of the minimum energy of the lithium-ion embedding.

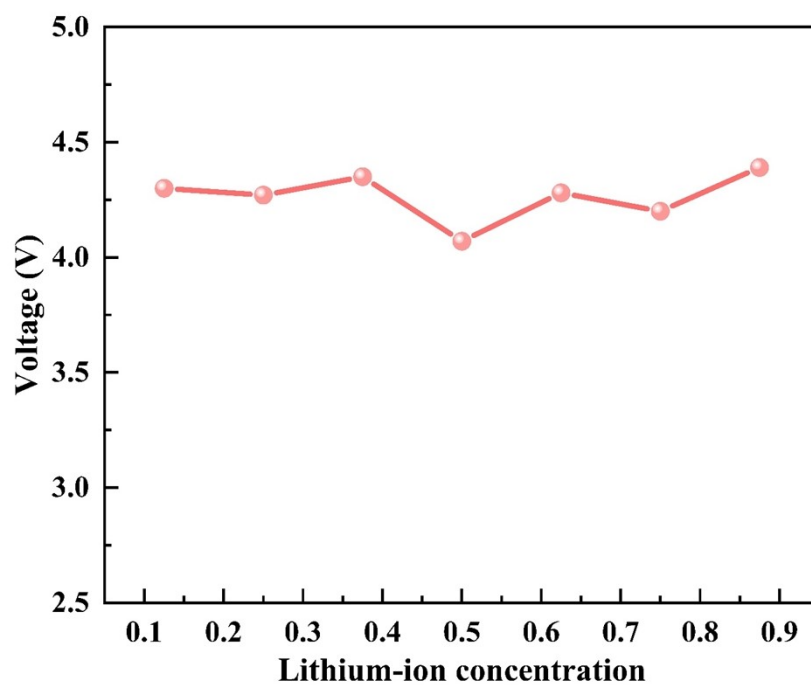

**Fig. S7** The voltage platform of the  $\text{Li}_x\text{Mn}_2\text{O}_4$  during the charge and discharge process.

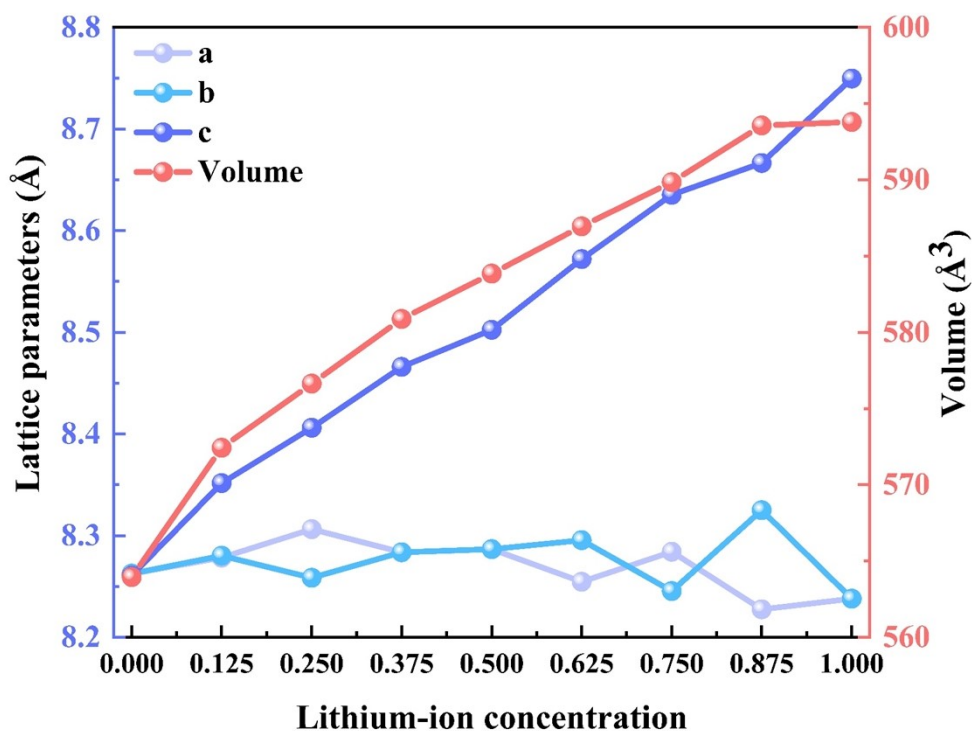

**Fig. S8** Change of lattice constants and volume with concentration.

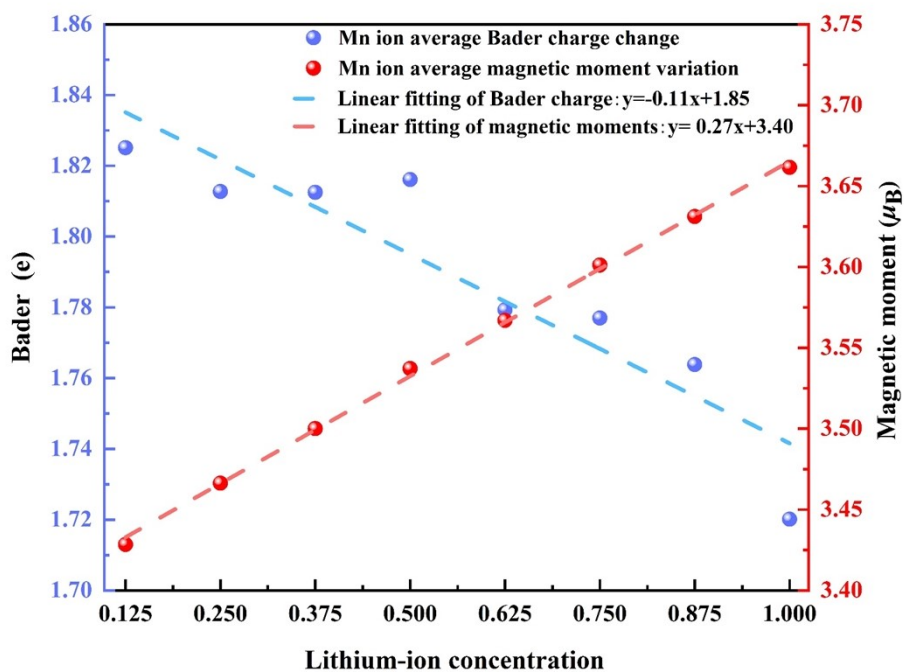

**Fig. S9** Average magnetic moment and average Bader charge of Mn ion with lithium-ions concentration.

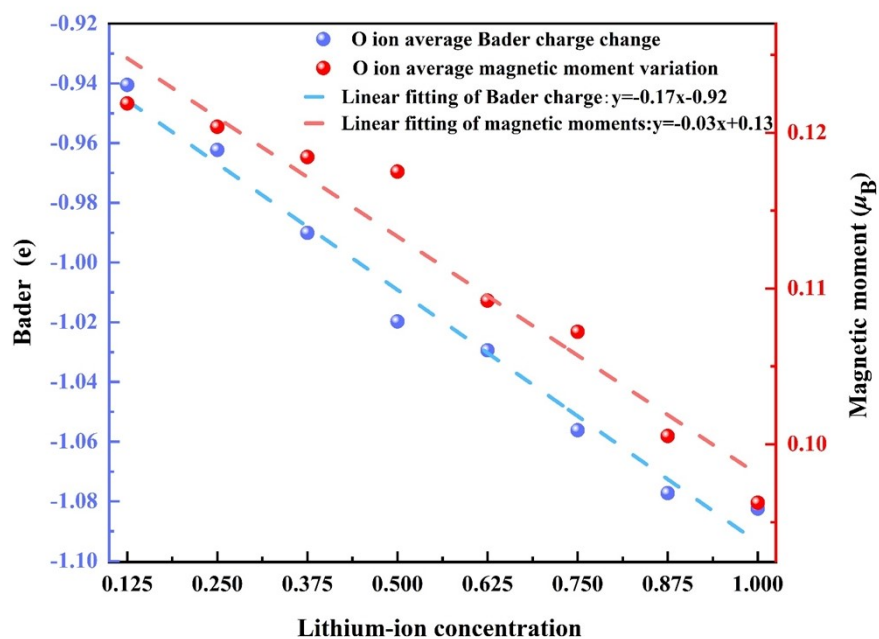

**Fig. S10** Average magnetic moment and average Bader charge of O ion with lithium-ions concentration.

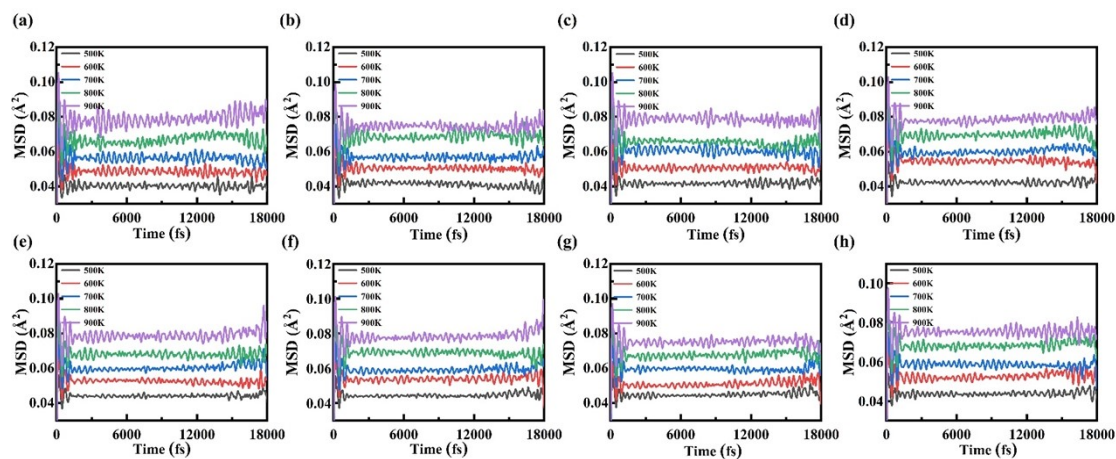

**Fig. S11** The variation of MSD at different temperatures for Mn ions in  $\text{Li}_x\text{Mn}_2\text{O}_4$  with the concentration of (a)  $x=0.125$ , (b)  $x=0.250$ , (c)  $x=0.375$ , (d)  $x=0.500$ , (e)  $x=0.625$ , (f)  $x=0.750$ , (g)  $x=0.875$ , (h)  $x=1.000$ .



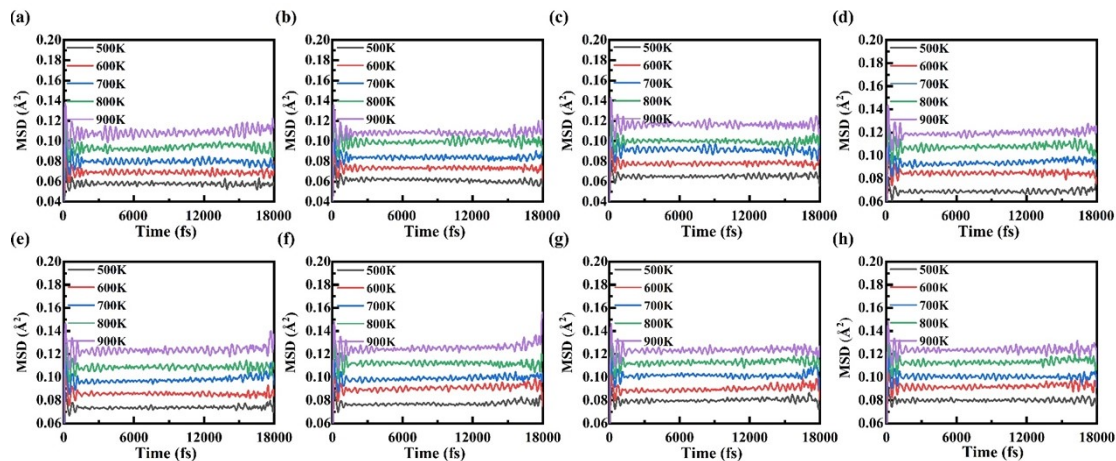

**Fig. S12** The variation of MSD at different temperatures for oxygen-ions in  $\text{Li}_x\text{Mn}_2\text{O}_4$  with the concentration of (a)  $x=0.125$ , (b)  $x=0.250$ , (c)  $x=0.375$ , (d)  $x=0.500$ , (e)  $x=0.625$ , (f)  $x=0.750$ , (g)  $x=0.875$ , (h)  $x=1.000$ .

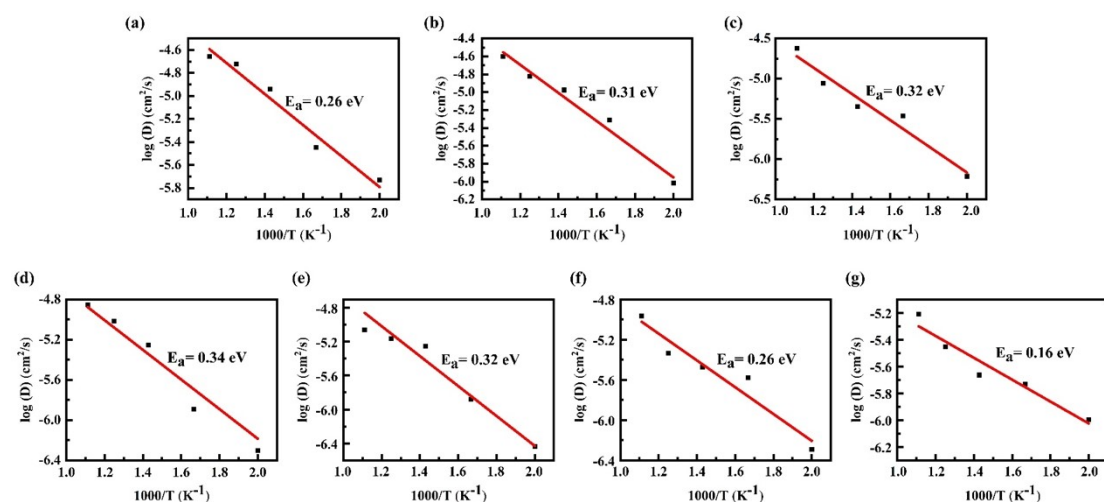

**Fig. S13** A linear fit based on the Arrhenius formula between  $\log(D)$  and  $1000/T$ .



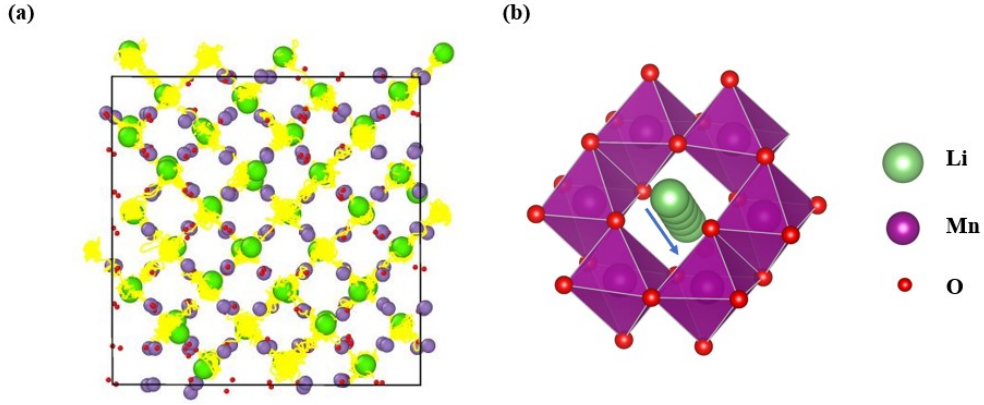

**Fig. S14** (a) Diffusion trajectories (yellow track) of lithium-ions in MD and (b) the schematic diagram of diffusion path for lithium-ions (8a-16c-8a).

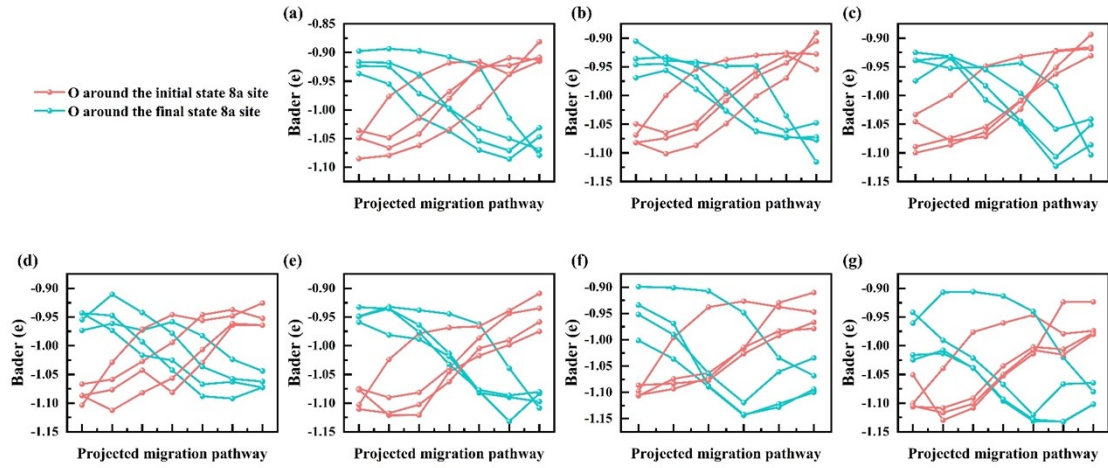

**Fig. S15** The O ion around the lithium-ion diffusion at 8a site in  $\text{Li}_x\text{Mn}_2\text{O}_4$  is obtained Bader charge change for (a)  $x=0.125$ , (b)  $x=0.250$ , (c)  $x=0.375$ , (d)  $x=0.500$ , (e)  $x=0.625$ , (f)  $x=0.750$ , and (g)  $x=0.875$ .

**Table S1. Comparison of diffusion coefficient with previous theory at 300K extrapolation.**

| <b>Lithium-ion<br/>concentration</b> | <b>Lithium-ion diffusion coefficient (cm<sup>2</sup>/s)</b> |                             |
|--------------------------------------|-------------------------------------------------------------|-----------------------------|
|                                      | <b>Previous job [Ref.40]</b>                                | <b>This work</b>            |
| <b>x=0.125</b>                       | <b>1.69×10<sup>-8</sup></b>                                 | <b>3.30×10<sup>-8</sup></b> |
| <b>x=0.500</b>                       | <b>9.26×10<sup>-9</sup></b>                                 | <b>2.60×10<sup>-9</sup></b> |
| <b>x=0.875</b>                       | <b>5.08×10<sup>-9</sup></b>                                 | <b>8.41×10<sup>-8</sup></b> |
